# Supplementary material for: Protective Mechanisms of Siloxane-Modified Epoxy Novolac Coatings at High-Pressure, High-Temperature Conditions
Source: PubMed Central journal article supplement — ACS Omega. 2024 Jul 7;9(28):30675–84. doi: 10.1021/acsomega.4c02986 (PMC11256288; doi:10.1021/acsomega.4c02986), 2024-07-07
Supplement: ao4c02986_si_001.pdf [file ao4c02986_si_001.pdf]

# **Protective mechanisms of siloxane-modified epoxy novolac coatings at high pressure high temperature conditions**

Narayanan Rajagopalan\*, Mads Olsen, Toke Skaarup Larsen, Tine Jensen Fjælberg, Claus Erik Weinell, and Søren Kiil\*

\*: Corresponding author email addresses: [naraj@kt.dtu.dk](mailto:naraj@kt.dtu.dk) and [sk@kt.dtu.dk](mailto:sk@kt.dtu.dk)  
CoaST, Department of Chemical and Biochemical Engineering, Technical University of Denmark, DTU,  
Building 229, 2800 Kgs. Lyngby, Denmark.

## **Supporting Information**

Differential Scanning Calorimetry (DSC) Analysis measuring the average glass transition temperatures ( $T_g$ ) across the different zones for the coatings before and after HPHT exposure.

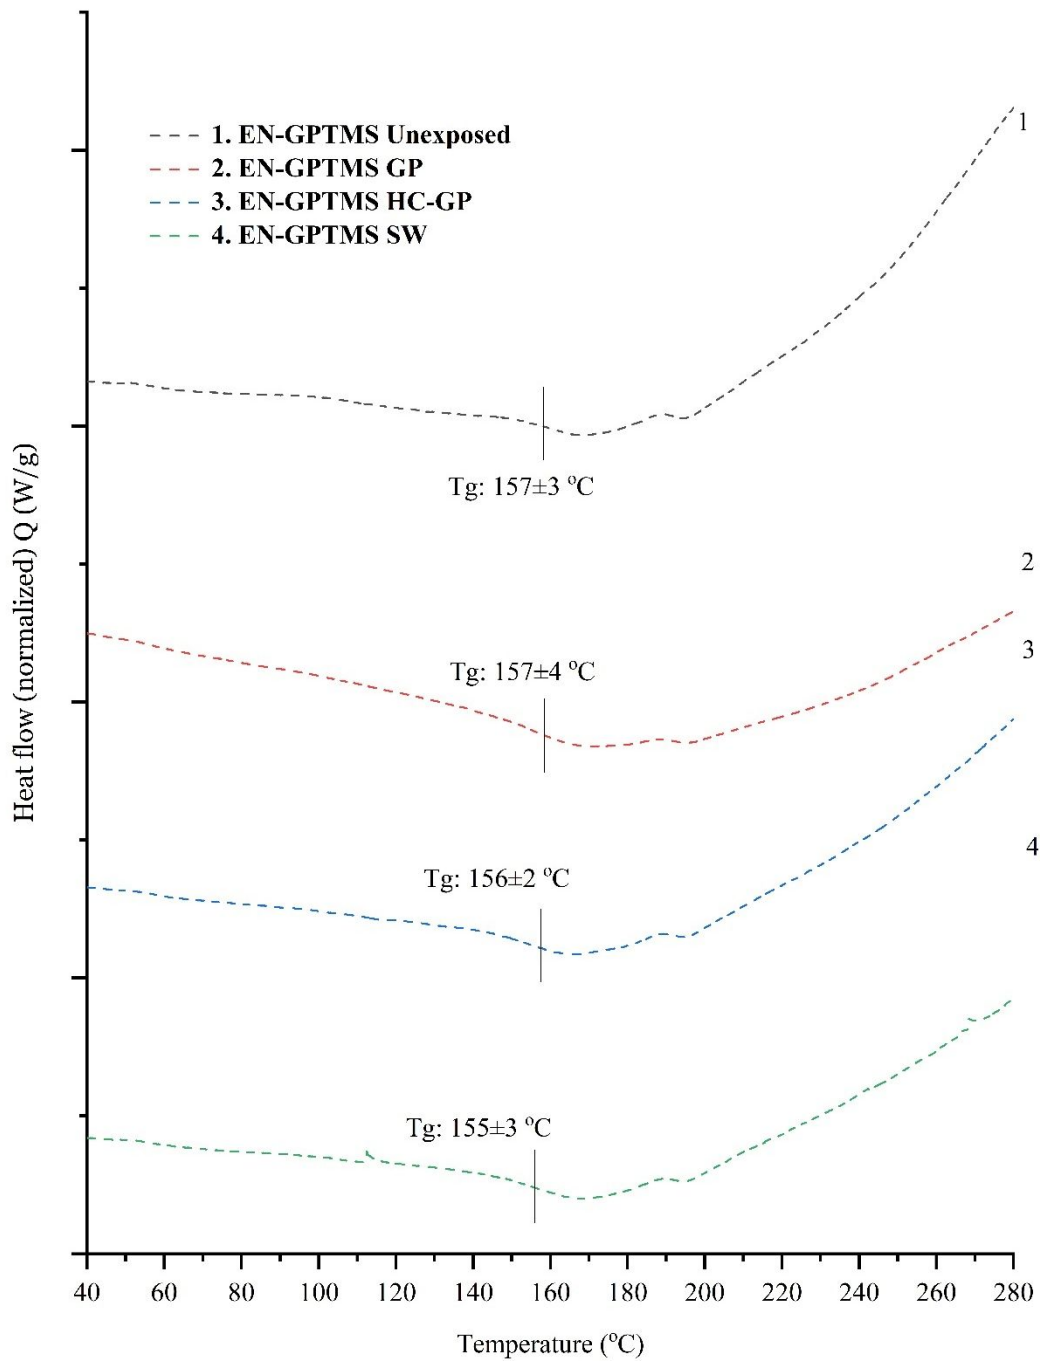

Fig. S1: Average glass transition temperatures ( $T_g$ ) across different zones for EN-GPTMS coatings before and after HPHT exposure.

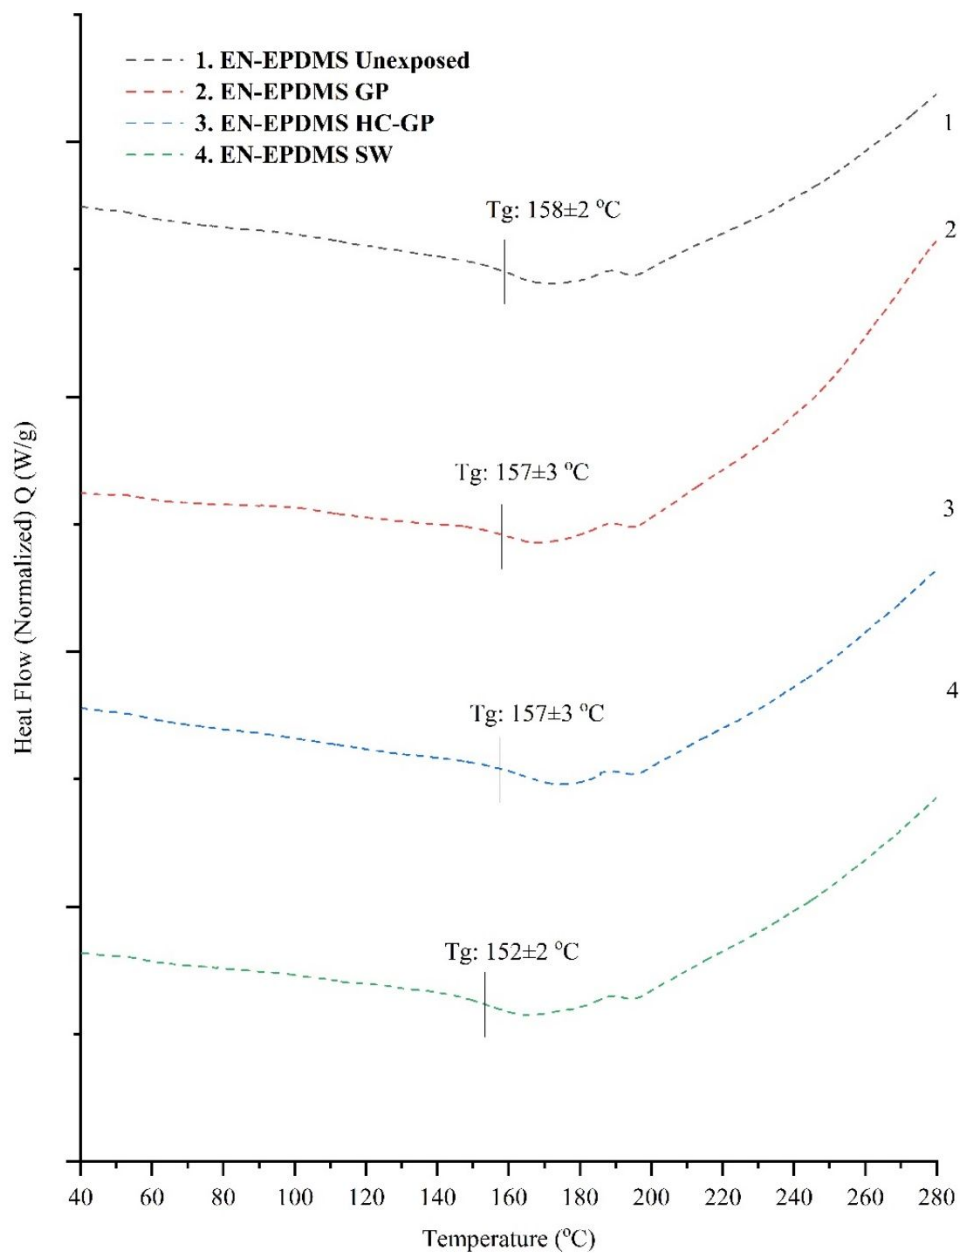

Fig. S2: Average glass transition temperatures (Tg) across different zones for EN-EPDMS coatings before and after HPHT exposure.
